# Supplementary material for: A prospective study of hepatic safety of statins used in very elderly patients
Source: PubMed Central journal article supplement (PMC6915904; doi:10.1186/s12877-019-1361-2), 2019-12-16
Supplement: 12877_2019_1361_MOESM1_ESM.pdf [file 12877_2019_1361_MOESM1_ESM.pdf]

| No. | Age   | Sex    | Hepatitis B | Fatty Liver | Biliary calculus | Complications | Other drugs | Drinking habits | Statin variety | Statin dose | Hepatic damage |
|-----|-------|--------|-------------|-------------|------------------|---------------|-------------|-----------------|----------------|-------------|----------------|
| 1   | 80≈85 | Male   | Yes         | Yes         | No               | ≥5            | 5≈10        | No drinking     | Atorvastatin   | Standard    | No             |
| 2   | 80≈85 | Male   | No          | No          | No               | 3≈5           | 5≈10        | No drinking     | Simvastatin    | Standard    | No             |
| 3   | 80≈85 | Male   | No          | No          | No               | ≥5            | 5≈10        | No drinking     | Simvastatin    | Standard    | No             |
| 4   | 80≈85 | Female | No          | No          | No               | 3≈5           | <5          | No drinking     | Fluvastatin    | Standard    | No             |
| 5   | 80≈85 | Male   | No          | No          | No               | ≥5            | 5≈10        | No drinking     | Fluvastatin    | Standard    | No             |
| 6   | 80≈85 | Female | No          | No          | No               | ≥5            | 5≈10        | No drinking     | Fluvastatin    | Standard    | No             |
| 7   | 85≈90 | Male   | No          | No          | No               | ≥5            | 5≈10        | No drinking     | Simvastatin    | Standard    | No             |
| 8   | 80≈85 | Male   | No          | No          | No               | 3≈5           | 5≈10        | No drinking     | Atorvastatin   | Standard    | No             |
| 9   | ≥90   | Male   | No          | No          | No               | 3≈5           | 5≈10        | No drinking     | Atorvastatin   | Standard    | No             |
| 10  | 80≈85 | Male   | No          | No          | No               | 3≈5           | 5≈10        | No drinking     | Fluvastatin    | Standard    | No             |
| 11  | 80≈85 | Male   | No          | No          | No               | ≥5            | 5≈10        | No drinking     | Atorvastatin   | Low         | No             |
| 12  | 80≈85 | Male   | No          | No          | Yes              | ≥5            | 5≈10        | No drinking     | Simvastatin    | Standard    | No             |
| 13  | 85≈90 | Male   | No          | No          | No               | ≥5            | 5≈10        | No drinking     | Fluvastatin    | Standard    | No             |
| 14  | 80≈85 | Male   | No          | No          | No               | 3≈5           | 5≈10        | No drinking     | Simvastatin    | Standard    | No             |
| 15  | 80≈85 | Male   | No          | No          | No               | ≥5            | 5≈10        | No drinking     | Rosuvastatin   | Standard    | No             |
| 16  | 85≈90 | Male   | No          | No          | Yes              | ≥5            | 5≈10        | No drinking     | Atorvastatin   | Standard    | No             |
| 17  | 80≈85 | Male   | No          | No          | No               | ≥5            | 5≈10        | No drinking     | Simvastatin    | Standard    | No             |
| 18  | 80≈85 | Male   | No          | No          | No               | 3≈5           | 5≈10        | No drinking     | Fluvastatin    | Standard    | No             |
| 19  | 85≈90 | Male   | No          | No          | No               | ≥5            | 5≈10        | No drinking     | Simvastatin    | Standard    | No             |
| 20  | 80≈85 | Male   | No          | No          | No               | 3≈5           | <5          | No drinking     | Atorvastatin   | Standard    | No             |
| 21  | 85≈90 | Male   | No          | No          | No               | ≥5            | 5≈10        | No drinking     | Simvastatin    | Standard    | No             |
| 22  | 85≈90 | Male   | No          | No          | No               | ≥5            | 5≈10        | No drinking     | Atorvastatin   | Standard    | No             |
| 23  | 85≈90 | Female | No          | Yes         | No               | ≥5            | 5≈10        | No drinking     | Fluvastatin    | Standard    | No             |
| 24  | ≥90   | Male   | No          | No          | No               | 3≈5           | <5          | No drinking     | Pravastatin    | Standard    | No             |
| 25  | 80≈85 | Male   | No          | No          | No               | 3≈5           | 5≈10        | No drinking     | Fluvastatin    | Standard    | No             |
| 26  | 80≈85 | Male   | Yes         | No          | Yes              | ≥5            | 5≈10        | No drinking     | Simvastatin    | Standard    | No             |
| 27  | 85≈90 | Male   | No          | No          | Yes              | ≥5            | 5≈10        | No drinking     | Atorvastatin   | Low         | No             |
| 28  | 80≈85 | Male   | No          | No          | No               | 3≈5           | 5≈10        | No drinking     | Rosuvastatin   | Standard    | No             |
| 29  | 80≈85 | Female | No          | No          | No               | ≥5            | 5≈10        | No drinking     | Fluvastatin    | Standard    | No             |
| 30  | 85≈90 | Female | No          | No          | No               | ≥5            | <5          | No drinking     | Atorvastatin   | Standard    | No             |
| 31  | 85≈90 | Male   | No          | No          | No               | ≥5            | 5≈10        | No drinking     | Pravastatin    | Standard    | No             |
| 32  | 85≈90 | Male   | No          | No          | No               | ≥5            | 5≈10        | No drinking     | Simvastatin    | Standard    | No             |
| 33  | 85≈90 | Female | No          | No          | Yes              | 3≈5           | <5          | No drinking     | Simvastatin    | Standard    | No             |
| 34  | 85≈90 | Male   | No          | No          | No               | ≥5            | 5≈10        | No drinking     | Atorvastatin   | Standard    | No             |
| 35  | 80≈85 | Male   | No          | No          | No               | ≥5            | 5≈10        | No drinking     | Fluvastatin    | Standard    | No             |
| 36  | 85≈90 | Male   | No          | No          | No               | ≥5            | 5≈10        | No drinking     | Rosuvastatin   | Standard    | No             |
| 37  | 80≈85 | Male   | No          | No          | No               | ≥5            | <5          | No drinking     | Pravastatin    | Standard    | No             |
| 38  | 80≈85 | Male   | No          | No          | No               | ≥5            | <5          | No drinking     | Simvastatin    | Standard    | No             |
| 39  | 80≈85 | Female | No          | No          | No               | ≥5            | 5≈10        | No drinking     | Atorvastatin   | Standard    | No             |
| 40  | 80≈85 | Male   | No          | No          | No               | 3≈5           | <5          | No drinking     | Simvastatin    | Standard    | No             |
| 41  | 80≈85 | Female | No          | No          | No               | ≥5            | 5≈10        | No drinking     | Atorvastatin   | Standard    | No             |
| 42  | 85≈90 | Male   | No          | No          | No               | ≥5            | 5≈10        | No drinking     | Fluvastatin    | Standard    | No             |
| 43  | 85≈90 | Male   | No          | No          | No               | 3≈5           | 5≈10        | No drinking     | Atorvastatin   | Standard    | No             |
| 44  | 80≈85 | Male   | No          | No          | No               | ≥5            | 5≈10        | No drinking     | Simvastatin    | Standard    | No             |
| 45  | 80≈85 | Female | No          | Yes         | No               | ≥5            | 5≈10        | No drinking     | Atorvastatin   | Low         | No             |
| 46  | 85≈90 | Male   | No          | No          | No               | ≥5            | 5≈10        | No drinking     | Rosuvastatin   | Standard    | No             |
| 47  | 80≈85 | Female | No          | No          | No               | 3≈5           | <5          | No drinking     | Fluvastatin    | Standard    | No             |

| No. | Age   | Sex    | Hepatitis B | Fatty Liver | Biliary calculus | Complications | Other drugs | Drinking habits | Statin variety | Statin dose | Hepatic damage |
|-----|-------|--------|-------------|-------------|------------------|---------------|-------------|-----------------|----------------|-------------|----------------|
| 48  | 85≈90 | Male   | No          | No          | No               | ≥5            | <5          | No drinking     | Simvastatin    | Standard    | No             |
| 49  | 80≈85 | Male   | No          | No          | No               | ≥5            | 5≈10        | No drinking     | Fluvastatin    | Standard    | No             |
| 50  | 80≈85 | Male   | No          | No          | No               | ≥5            | <5          | No drinking     | Atorvastatin   | Standard    | No             |
| 51  | ≥90   | Male   | No          | No          | No               | 3≈5           | <5          | No drinking     | Fluvastatin    | Standard    | No             |
| 52  | 85≈90 | Male   | No          | No          | No               | 3≈5           | 5≈10        | No drinking     | Fluvastatin    | Standard    | No             |
| 53  | 85≈90 | Male   | No          | No          | No               | 3≈5           | 5≈10        | No drinking     | Simvastatin    | Standard    | No             |
| 54  | 80≈85 | Female | No          | No          | Yes              | ≥5            | 5≈10        | No drinking     | Atorvastatin   | Standard    | No             |
| 55  | 80≈85 | Male   | No          | No          | No               | ≥5            | 5≈10        | No drinking     | Simvastatin    | Standard    | No             |
| 56  | 80≈85 | Male   | No          | No          | Yes              | 3≈5           | 5≈10        | No drinking     | Simvastatin    | Standard    | No             |
| 57  | 85≈90 | Male   | No          | No          | No               | ≤2            | <5          | No drinking     | Atorvastatin   | Standard    | No             |
| 58  | 80≈85 | Male   | No          | No          | No               | 3≈5           | 5≈10        | No drinking     | Simvastatin    | Low         | No             |
| 59  | 80≈85 | Female | No          | No          | No               | ≥5            | 5≈10        | No drinking     | Pravastatin    | Standard    | No             |
| 60  | 80≈85 | Male   | No          | No          | Yes              | ≥5            | <5          | No drinking     | Atorvastatin   | Standard    | No             |
| 61  | 80≈85 | Male   | No          | No          | No               | ≥5            | 5≈10        | No drinking     | Simvastatin    | Standard    | No             |
| 62  | 80≈85 | Female | No          | No          | No               | 3≈5           | ≥10         | No drinking     | Simvastatin    | Standard    | No             |
| 63  | 85≈90 | Male   | No          | No          | No               | ≥5            | <5          | No drinking     | Atorvastatin   | Standard    | No             |
| 64  | 85≈90 | Female | No          | No          | No               | 3≈5           | 5≈10        | No drinking     | Rosuvastatin   | Standard    | No             |
| 65  | 80≈85 | Female | No          | No          | No               | 3≈5           | 5≈10        | No drinking     | Fluvastatin    | Standard    | No             |
| 66  | 80≈85 | Male   | No          | No          | No               | ≥5            | 5≈10        | No drinking     | Simvastatin    | Standard    | No             |
| 67  | 85≈90 | Male   | No          | No          | Yes              | ≥5            | 5≈10        | No drinking     | Atorvastatin   | Standard    | No             |
| 68  | 80≈85 | Male   | No          | No          | Yes              | ≥5            | 5≈10        | No drinking     | Simvastatin    | Standard    | No             |
| 69  | ≥90   | Male   | No          | No          | Yes              | ≥5            | <5          | No drinking     | Pravastatin    | Standard    | No             |
| 70  | 80≈85 | Female | No          | No          | No               | 3≈5           | 5≈10        | No drinking     | Atorvastatin   | Standard    | No             |
| 71  | 85≈90 | Male   | No          | No          | No               | ≥5            | 5≈10        | No drinking     | Pravastatin    | Low         | No             |
| 72  | ≥90   | Male   | No          | No          | No               | 3≈5           | 5≈10        | No drinking     | Fluvastatin    | Standard    | No             |
| 73  | 80≈85 | Male   | No          | No          | No               | ≥5            | 5≈10        | No drinking     | Simvastatin    | Standard    | No             |
| 74  | 80≈85 | Male   | No          | No          | No               | ≥5            | 5≈10        | No drinking     | Fluvastatin    | Standard    | No             |
| 75  | 85≈90 | Male   | No          | No          | No               | ≥5            | 5≈10        | No drinking     | Simvastatin    | Standard    | No             |
| 76  | 80≈85 | Male   | No          | No          | No               | 3≈5           | <5          | No drinking     | Atorvastatin   | Standard    | No             |
| 77  | 80≈85 | Male   | No          | No          | No               | 3≈5           | 5≈10        | No drinking     | Fluvastatin    | Standard    | No             |
| 78  | 80≈85 | Male   | No          | No          | No               | 3≈5           | 5≈10        | No drinking     | Simvastatin    | Standard    | No             |
| 79  | 85≈90 | Male   | No          | No          | No               | 3≈5           | <5          | No drinking     | Atorvastatin   | Low         | No             |
| 80  | ≥90   | Female | No          | No          | No               | 3≈5           | <5          | No drinking     | Rosuvastatin   | Standard    | No             |
| 81  | 80≈85 | Male   | No          | No          | No               | ≥5            | <5          | No drinking     | Simvastatin    | Standard    | No             |
| 82  | 85≈90 | Male   | No          | No          | Yes              | ≥5            | 5≈10        | No drinking     | Simvastatin    | Low         | No             |
| 83  | ≥90   | Female | No          | No          | No               | ≥5            | 5≈10        | No drinking     | Atorvastatin   | Standard    | No             |
| 84  | 85≈90 | Female | No          | No          | No               | ≥5            | 5≈10        | No drinking     | Simvastatin    | Standard    | No             |
| 85  | 85≈90 | Male   | No          | Yes         | Yes              | ≥5            | 5≈10        | No drinking     | Fluvastatin    | Standard    | No             |
| 86  | 85≈90 | Male   | No          | No          | Yes              | ≥5            | 5≈10        | No drinking     | Atorvastatin   | Standard    | No             |
| 87  | ≥90   | Male   | No          | No          | No               | ≥5            | 5≈10        | No drinking     | Fluvastatin    | Standard    | No             |
| 88  | 85≈90 | Male   | No          | No          | No               | ≥5            | 5≈10        | No drinking     | Pravastatin    | Standard    | No             |
| 89  | 85≈90 | Male   | No          | No          | Yes              | ≥5            | 5≈10        | No drinking     | Atorvastatin   | Standard    | No             |
| 90  | ≥90   | Male   | No          | No          | No               | ≥5            | 5≈10        | No drinking     | Fluvastatin    | Standard    | No             |
| 91  | 80≈85 | Female | No          | No          | No               | 3≈5           | <5          | No drinking     | Atorvastatin   | Low         | No             |
| 92  | 80≈85 | Male   | No          | No          | No               | ≥5            | 5≈10        | No drinking     | Fluvastatin    | Standard    | No             |
| 93  | 80≈85 | Female | No          | No          | No               | ≥5            | 5≈10        | No drinking     | Pravastatin    | Standard    | No             |
| 94  | 85≈90 | Male   | Yes         | No          | Yes              | ≥5            | 5≈10        | No drinking     | Atorvastatin   | Standard    | No             |

| No. | Age   | Sex    | Hepatitis B | Fatty Liver | Biliary calculus | Complications | Other drugs | Drinking habits | Statin variety | Statin dose | Hepatic damage |
|-----|-------|--------|-------------|-------------|------------------|---------------|-------------|-----------------|----------------|-------------|----------------|
| 95  | 85≈90 | Male   | No          | No          | No               | 3≈5           | 5≈10        | No drinking     | Fluvastatin    | Standard    | No             |
| 96  | 80≈85 | Male   | No          | No          | No               | ≥5            | <5          | No drinking     | Atorvastatin   | Standard    | No             |
| 97  | 80≈85 | Male   | No          | No          | Yes              | 3≈5           | 5≈10        | No drinking     | Fluvastatin    | Standard    | No             |
| 98  | 80≈85 | Male   | No          | Yes         | No               | ≥5            | 5≈10        | No drinking     | Simvastatin    | Standard    | No             |
| 99  | 80≈85 | Male   | No          | No          | No               | ≥5            | 5≈10        | No drinking     | Pravastatin    | Standard    | No             |
| 100 | 80≈85 | Male   | No          | No          | No               | ≥5            | 5≈10        | No drinking     | Atorvastatin   | Low         | No             |
| 101 | 85≈90 | Male   | No          | No          | No               | ≥5            | <5          | No drinking     | Simvastatin    | Standard    | No             |
| 102 | 80≈85 | Male   | No          | No          | No               | 3≈5           | <5          | No drinking     | Fluvastatin    | Standard    | No             |
| 103 | 80≈85 | Female | No          | No          | No               | ≥5            | 5≈10        | No drinking     | Atorvastatin   | Standard    | No             |
| 104 | 80≈85 | Female | No          | No          | No               | 3≈5           | 5≈10        | No drinking     | Fluvastatin    | Standard    | No             |
| 105 | 80≈85 | Male   | No          | No          | No               | ≥5            | 5≈10        | No drinking     | Fluvastatin    | Standard    | No             |
| 106 | ≥90   | Female | No          | No          | Yes              | ≥5            | 5≈10        | No drinking     | Atorvastatin   | Standard    | No             |
| 107 | 80≈85 | Male   | No          | No          | No               | ≥5            | 5≈10        | No drinking     | Rosuvastatin   | Standard    | No             |
| 108 | 80≈85 | Male   | No          | No          | Yes              | ≥5            | 5≈10        | No drinking     | Simvastatin    | Low         | No             |
| 109 | 85≈90 | Male   | No          | No          | Yes              | ≥5            | 5≈10        | No drinking     | Atorvastatin   | Standard    | No             |
| 110 | 85≈90 | Male   | No          | No          | No               | ≥5            | <5          | No drinking     | Rosuvastatin   | Standard    | No             |
| 111 | 85≈90 | Male   | No          | No          | No               | 3≈5           | <5          | No drinking     | Fluvastatin    | Standard    | No             |
| 112 | 85≈90 | Male   | No          | No          | No               | 3≈5           | <5          | No drinking     | Rosuvastatin   | Standard    | No             |
| 113 | 85≈90 | Male   | No          | No          | No               | ≥5            | <5          | No drinking     | Rosuvastatin   | Low         | No             |
| 114 | 85≈90 | Male   | No          | No          | No               | ≥5            | 5≈10        | No drinking     | Fluvastatin    | Standard    | No             |
| 115 | 85≈90 | Male   | No          | No          | No               | ≥5            | 5≈10        | No drinking     | Atorvastatin   | Standard    | No             |
| 116 | 85≈90 | Male   | No          | No          | No               | 3≈5           | <5          | No drinking     | Simvastatin    | Standard    | No             |
| 117 | 80≈85 | Female | No          | No          | Yes              | ≥5            | 5≈10        | No drinking     | Fluvastatin    | Standard    | No             |
| 118 | 80≈85 | Female | No          | No          | No               | ≥5            | 5≈10        | No drinking     | Fluvastatin    | Standard    | No             |
| 119 | 80≈85 | Male   | No          | No          | Yes              | 3≈5           | <5          | No drinking     | Rosuvastatin   | Standard    | No             |
| 120 | 80≈85 | Male   | No          | No          | Yes              | 3≈5           | <5          | No drinking     | Simvastatin    | Low         | No             |
| 121 | 80≈85 | Male   | No          | No          | No               | ≥5            | 5≈10        | No drinking     | Atorvastatin   | Standard    | No             |
| 122 | 80≈85 | Male   | No          | No          | No               | 3≈5           | 5≈10        | No drinking     | Pravastatin    | Standard    | No             |
| 123 | 80≈85 | Male   | No          | No          | No               | 3≈5           | <5          | No drinking     | Fluvastatin    | Standard    | No             |
| 124 | 85≈90 | Male   | No          | No          | No               | 3≈5           | 5≈10        | No drinking     | Atorvastatin   | Standard    | No             |
| 125 | 85≈90 | Male   | No          | No          | Yes              | ≥5            | 5≈10        | No drinking     | Simvastatin    | Low         | No             |
| 126 | 80≈85 | Male   | No          | No          | No               | ≥5            | 5≈10        | No drinking     | Fluvastatin    | Standard    | No             |
| 127 | 80≈85 | Male   | No          | No          | No               | ≥5            | 5≈10        | No drinking     | Fluvastatin    | Standard    | No             |
| 128 | 85≈90 | Male   | No          | Yes         | No               | ≥5            | 5≈10        | No drinking     | Atorvastatin   | Low         | No             |
| 129 | 80≈85 | Male   | No          | No          | Yes              | 3≈5           | 5≈10        | No drinking     | Fluvastatin    | Standard    | No             |
| 130 | 80≈85 | Male   | No          | No          | No               | ≥5            | 5≈10        | No drinking     | Atorvastatin   | Standard    | No             |
| 131 | 85≈90 | Male   | No          | No          | No               | 3≈5           | <5          | No drinking     | Rosuvastatin   | Standard    | No             |
| 132 | 80≈85 | Male   | No          | No          | No               | ≥5            | 5≈10        | No drinking     | Fluvastatin    | Standard    | No             |
| 133 | 80≈85 | Male   | No          | No          | Yes              | ≥5            | <5          | No drinking     | Simvastatin    | Standard    | No             |
| 134 | 85≈90 | Male   | No          | No          | No               | ≥5            | 5≈10        | No drinking     | Atorvastatin   | Standard    | No             |
| 135 | 80≈85 | Male   | No          | No          | No               | 3≈5           | 5≈10        | No drinking     | Atorvastatin   | Standard    | No             |
| 136 | 80≈85 | Male   | No          | No          | No               | 3≈5           | 5≈10        | No drinking     | Simvastatin    | Standard    | No             |
| 137 | 80≈85 | Male   | No          | No          | No               | ≥5            | 5≈10        | No drinking     | Pravastatin    | Low         | No             |
| 138 | 80≈85 | Male   | No          | No          | Yes              | ≥5            | 5≈10        | No drinking     | Atorvastatin   | Standard    | No             |
| 139 | 85≈90 | Male   | No          | No          | No               | 3≈5           | <5          | No drinking     | Fluvastatin    | Standard    | No             |
| 140 | 85≈90 | Male   | No          | No          | Yes              | 3≈5           | <5          | No drinking     | Fluvastatin    | Standard    | No             |
| 141 | 85≈90 | Female | No          | No          | No               | ≥5            | 5≈10        | No drinking     | Atorvastatin   | Standard    | No             |

| No. | Age   | Sex    | Hepatitis B | Fatty Liver | Biliary calculus | Complications | Other drugs | Drinking habits | Statin variety | Statin dose | Hepatic damage |
|-----|-------|--------|-------------|-------------|------------------|---------------|-------------|-----------------|----------------|-------------|----------------|
| 142 | 80≈85 | Male   | No          | No          | Yes              | ≥5            | 5≈10        | No drinking     | Simvastatin    | Low         | No             |
| 143 | 80≈85 | Male   | No          | No          | No               | ≤2            | <5          | No drinking     | Fluvastatin    | Standard    | No             |
| 144 | ≥90   | Male   | No          | No          | No               | ≥5            | 5≈10        | No drinking     | Atorvastatin   | Low         | No             |
| 145 | 80≈85 | Male   | No          | Yes         | No               | ≥5            | 5≈10        | No drinking     | Rosuvastatin   | Standard    | No             |
| 146 | ≥90   | Male   | No          | No          | No               | ≥5            | 5≈10        | No drinking     | Pravastatin    | Standard    | No             |
| 147 | 80≈85 | Male   | No          | No          | No               | ≥5            | <5          | No drinking     | Rosuvastatin   | Standard    | No             |
| 148 | 80≈85 | Male   | No          | No          | Yes              | 3≈5           | <5          | No drinking     | Atorvastatin   | Standard    | No             |
| 149 | 80≈85 | Female | No          | No          | No               | ≥5            | <5          | No drinking     | Simvastatin    | Standard    | No             |
| 150 | 80≈85 | Male   | No          | No          | No               | 3≈5           | 5≈10        | No drinking     | Fluvastatin    | Standard    | No             |
| 151 | 85≈90 | Male   | No          | No          | No               | 3≈5           | 5≈10        | No drinking     | Pravastatin    | Standard    | No             |
| 152 | 80≈85 | Male   | No          | No          | No               | 3≈5           | 5≈10        | No drinking     | Simvastatin    | Standard    | No             |
| 153 | 80≈85 | Male   | No          | No          | No               | 3≈5           | 5≈10        | No drinking     | Atorvastatin   | Standard    | No             |
| 154 | 80≈85 | Male   | No          | No          | No               | ≥5            | 5≈10        | No drinking     | Fluvastatin    | Standard    | No             |
| 155 | 80≈85 | Male   | No          | No          | Yes              | 3≈5           | 5≈10        | No drinking     | Simvastatin    | Standard    | No             |
| 156 | 85≈90 | Male   | No          | No          | No               | ≥5            | 5≈10        | No drinking     | Atorvastatin   | Low         | No             |
| 157 | 85≈90 | Male   | No          | No          | No               | ≥5            | 5≈10        | No drinking     | Fluvastatin    | Standard    | No             |
| 158 | 80≈85 | Male   | No          | No          | Yes              | ≥5            | 5≈10        | No drinking     | Simvastatin    | Standard    | No             |
| 159 | 80≈85 | Male   | No          | No          | No               | 3≈5           | 5≈10        | No drinking     | Simvastatin    | Low         | No             |
| 160 | 80≈85 | Male   | No          | No          | No               | 3≈5           | <5          | No drinking     | Rosuvastatin   | Standard    | No             |
| 161 | 80≈85 | Male   | No          | No          | No               | ≥5            | <5          | No drinking     | Atorvastatin   | Standard    | No             |
| 162 | 80≈85 | Male   | No          | No          | No               | 3≈5           | <5          | No drinking     | Fluvastatin    | Standard    | No             |
| 163 | 80≈85 | Male   | No          | No          | No               | 3≈5           | 5≈10        | No drinking     | Atorvastatin   | Standard    | No             |
| 164 | 85≈90 | Male   | No          | No          | No               | 3≈5           | 5≈10        | No drinking     | Pravastatin    | Standard    | No             |
| 165 | 80≈85 | Male   | No          | No          | No               | ≤2            | <5          | No drinking     | Atorvastatin   | Low         | No             |
| 166 | 85≈90 | Male   | No          | No          | No               | ≥5            | 5≈10        | No drinking     | Simvastatin    | Standard    | No             |
| 167 | 85≈90 | Male   | No          | No          | No               | ≥5            | 5≈10        | No drinking     | Rosuvastatin   | Standard    | No             |
| 168 | 80≈85 | Male   | No          | No          | No               | ≥5            | 5≈10        | No drinking     | Atorvastatin   | Standard    | No             |
| 169 | 85≈90 | Female | No          | No          | No               | 3≈5           | <5          | No drinking     | Atorvastatin   | Low         | No             |
| 170 | 80≈85 | Male   | Yes         | No          | No               | 3≈5           | <5          | No drinking     | Fluvastatin    | Standard    | No             |
| 171 | 80≈85 | Male   | No          | No          | No               | 3≈5           | 5≈10        | No drinking     | Simvastatin    | Standard    | No             |
| 172 | 80≈85 | Male   | No          | No          | Yes              | ≥5            | 5≈10        | No drinking     | Simvastatin    | Low         | No             |
| 173 | 80≈85 | Male   | No          | No          | No               | ≥5            | 5≈10        | No drinking     | Atorvastatin   | Standard    | No             |
| 174 | 80≈85 | Male   | No          | No          | No               | ≥5            | 5≈10        | No drinking     | Fluvastatin    | Standard    | No             |
| 175 | 80≈85 | Male   | No          | No          | No               | 3≈5           | 5≈10        | No drinking     | Simvastatin    | Low         | No             |
| 176 | 80≈85 | Male   | No          | No          | No               | ≥5            | 5≈10        | No drinking     | Fluvastatin    | Standard    | No             |
| 177 | 85≈90 | Male   | No          | No          | No               | 3≈5           | <5          | No drinking     | Fluvastatin    | Standard    | No             |
| 178 | 85≈90 | Male   | No          | No          | No               | ≥5            | <5          | No drinking     | Atorvastatin   | Standard    | No             |
| 179 | 80≈85 | Female | No          | No          | No               | ≥5            | 5≈10        | No drinking     | Fluvastatin    | Standard    | No             |
| 180 | 80≈85 | Female | No          | No          | No               | ≥5            | 5≈10        | No drinking     | Rosuvastatin   | Standard    | No             |
| 181 | 80≈85 | Female | No          | No          | No               | 3≈5           | 5≈10        | No drinking     | Pravastatin    | Low         | No             |
| 182 | 85≈90 | Male   | No          | No          | No               | 3≈5           | <5          | No drinking     | Pravastatin    | Standard    | No             |
| 183 | 85≈90 | Male   | No          | No          | No               | ≥5            | 5≈10        | No drinking     | Atorvastatin   | Standard    | No             |
| 184 | 80≈85 | Male   | No          | No          | No               | ≥5            | 5≈10        | No drinking     | Fluvastatin    | Standard    | No             |
| 185 | 80≈85 | Male   | No          | No          | Yes              | ≥5            | 5≈10        | No drinking     | Pravastatin    | Standard    | No             |
| 186 | 80≈85 | Male   | No          | No          | No               | 3≈5           | 5≈10        | No drinking     | Atorvastatin   | Standard    | No             |
| 187 | ≥90   | Male   | No          | No          | No               | 3≈5           | 5≈10        | No drinking     | Fluvastatin    | Standard    | No             |
| 188 | 80≈85 | Male   | No          | No          | No               | ≥5            | 5≈10        | No drinking     | Simvastatin    | Standard    | No             |

| No. | Age   | Sex    | Hepatitis B | Fatty Liver | Biliary calculus | Complications | Other drugs | Drinking habits  | Statin variety | Statin dose | Hepatic damage |
|-----|-------|--------|-------------|-------------|------------------|---------------|-------------|------------------|----------------|-------------|----------------|
| 189 | 85≈90 | Male   | No          | No          | No               | ≥5            | 5≈10        | No drinking      | Rosuvastatin   | Standard    | No             |
| 190 | ≥90   | Female | No          | No          | No               | ≥5            | 5≈10        | No drinking      | Atorvastatin   | Standard    | No             |
| 191 | 80≈85 | Male   | No          | No          | No               | ≥5            | 5≈10        | No drinking      | Fluvastatin    | Standard    | No             |
| 192 | 85≈90 | Female | No          | No          | No               | 3≈5           | <5          | No drinking      | Simvastatin    | Standard    | No             |
| 193 | 85≈90 | Female | No          | No          | Yes              | 3≈5           | <5          | No drinking      | Atorvastatin   | Standard    | No             |
| 194 | 80≈85 | Female | No          | No          | No               | 3≈5           | 5≈10        | No drinking      | Rosuvastatin   | Standard    | No             |
| 195 | 80≈85 | Male   | No          | No          | No               | ≥5            | 5≈10        | Mild to moderate | Atorvastatin   | Standard    | No             |
| 196 | 80≈85 | Male   | No          | No          | No               | ≥5            | 5≈10        | No drinking      | Fluvastatin    | Standard    | No             |
| 197 | 80≈85 | Male   | No          | No          | No               | ≥5            | 5≈10        | No drinking      | Pravastatin    | Standard    | No             |
| 198 | 85≈90 | Male   | No          | No          | No               | 3≈5           | <5          | No drinking      | Atorvastatin   | Standard    | No             |
| 199 | 80≈85 | Female | No          | No          | No               | 3≈5           | <5          | No drinking      | Simvastatin    | Standard    | No             |
| 200 | 80≈85 | Male   | No          | No          | No               | ≥5            | 5≈10        | No drinking      | Atorvastatin   | Standard    | No             |
| 201 | 80≈85 | Male   | No          | No          | No               | 3≈5           | 5≈10        | No drinking      | Simvastatin    | Standard    | No             |
| 202 | 80≈85 | Male   | No          | No          | No               | ≥5            | 5≈10        | No drinking      | Rosuvastatin   | Standard    | No             |
| 203 | 80≈85 | Male   | No          | Yes         | No               | 3≈5           | 5≈10        | No drinking      | Atorvastatin   | Standard    | No             |
| 204 | 80≈85 | Male   | No          | No          | No               | ≥5            | 5≈10        | No drinking      | Simvastatin    | Standard    | No             |
| 205 | 80≈85 | Male   | No          | No          | No               | 3≈5           | 5≈10        | No drinking      | Fluvastatin    | Standard    | No             |
| 206 | 80≈85 | Male   | Yes         | No          | No               | ≥5            | 5≈10        | No drinking      | Fluvastatin    | Standard    | No             |
| 207 | 80≈85 | Male   | No          | No          | No               | ≤2            | <5          | No drinking      | Atorvastatin   | Standard    | No             |
| 208 | 85≈90 | Male   | No          | No          | No               | ≥5            | 5≈10        | No drinking      | Fluvastatin    | Standard    | No             |
| 209 | 80≈85 | Male   | No          | No          | No               | 3≈5           | 5≈10        | No drinking      | Simvastatin    | Standard    | No             |
| 210 | 80≈85 | Male   | No          | No          | No               | ≤2            | <5          | No drinking      | Simvastatin    | Standard    | No             |
| 211 | 85≈90 | Male   | No          | No          | No               | 3≈5           | 5≈10        | No drinking      | Pravastatin    | Low         | No             |
| 212 | 85≈90 | Male   | No          | No          | No               | 3≈5           | 5≈10        | No drinking      | Atorvastatin   | Standard    | No             |
| 213 | 85≈90 | Male   | No          | No          | No               | 3≈5           | 5≈10        | No drinking      | Pravastatin    | Standard    | No             |
| 214 | 85≈90 | Male   | No          | No          | No               | 3≈5           | 5≈10        | No drinking      | Simvastatin    | Standard    | No             |
| 215 | 80≈85 | Male   | No          | No          | No               | 3≈5           | 5≈10        | No drinking      | Fluvastatin    | Standard    | No             |
| 216 | 80≈85 | Male   | No          | No          | No               | 3≈5           | 5≈10        | No drinking      | Pravastatin    | Standard    | No             |
| 217 | 80≈85 | Male   | No          | No          | No               | 3≈5           | <5          | No drinking      | Atorvastatin   | Standard    | No             |
| 218 | 85≈90 | Male   | No          | No          | No               | 3≈5           | 5≈10        | No drinking      | Simvastatin    | Standard    | No             |
| 219 | ≥90   | Male   | No          | No          | No               | ≥5            | 5≈10        | No drinking      | Fluvastatin    | Standard    | No             |
| 220 | 80≈85 | Male   | No          | No          | No               | 3≈5           | <5          | No drinking      | Rosuvastatin   | Standard    | No             |
| 221 | 80≈85 | Male   | No          | No          | No               | ≤2            | 5≈10        | No drinking      | Atorvastatin   | Standard    | No             |
| 222 | 80≈85 | Male   | No          | No          | No               | 3≈5           | 5≈10        | No drinking      | Fluvastatin    | Standard    | No             |
| 223 | 80≈85 | Male   | No          | No          | No               | 3≈5           | 5≈10        | No drinking      | Simvastatin    | Standard    | No             |
| 224 | 80≈85 | Male   | No          | No          | No               | ≥5            | 5≈10        | No drinking      | Pravastatin    | Standard    | No             |
| 225 | ≥90   | Male   | No          | No          | Yes              | ≥5            | <5          | No drinking      | Atorvastatin   | Standard    | No             |
| 226 | 80≈85 | Male   | No          | No          | Yes              | 3≈5           | 5≈10        | No drinking      | Fluvastatin    | Standard    | No             |
| 227 | 80≈85 | Male   | No          | No          | No               | ≥5            | 5≈10        | No drinking      | Rosuvastatin   | Standard    | No             |
| 228 | 85≈90 | Female | No          | No          | No               | ≥5            | ≥10         | No drinking      | Atorvastatin   | Standard    | No             |
| 229 | 80≈85 | Male   | No          | No          | No               | 3≈5           | 5≈10        | No drinking      | Simvastatin    | Standard    | No             |
| 230 | 80≈85 | Male   | No          | No          | No               | ≥5            | 5≈10        | No drinking      | Fluvastatin    | Standard    | No             |
| 231 | 80≈85 | Male   | No          | No          | No               | 3≈5           | 5≈10        | No drinking      | Pravastatin    | Standard    | No             |
| 232 | 80≈85 | Male   | No          | Yes         | No               | 3≈5           | 5≈10        | No drinking      | Atorvastatin   | Standard    | No             |
| 233 | 80≈85 | Male   | No          | No          | No               | ≥5            | 5≈10        | No drinking      | Fluvastatin    | Standard    | No             |
| 234 | 80≈85 | Male   | No          | No          | No               | 3≈5           | <5          | No drinking      | Rosuvastatin   | Standard    | No             |
| 235 | 80≈85 | Male   | No          | No          | No               | ≥5            | 5≈10        | No drinking      | Pravastatin    | Standard    | No             |

| No. | Age   | Sex    | Hepatitis B | Fatty Liver | Biliary calculus | Complications | Other drugs | Drinking habits | Statin variety | Statin dose | Hepatic damage |
|-----|-------|--------|-------------|-------------|------------------|---------------|-------------|-----------------|----------------|-------------|----------------|
| 236 | 80≈85 | Female | No          | No          | No               | 3≈5           | 5≈10        | No drinking     | Rosuvastatin   | Standard    | No             |
| 237 | 80≈85 | Male   | No          | Yes         | Yes              | 3≈5           | 5≈10        | No drinking     | Atorvastatin   | Low         | No             |
| 238 | 80≈85 | Male   | No          | No          | No               | 3≈5           | 5≈10        | No drinking     | Rosuvastatin   | Standard    | No             |
| 239 | 85≈90 | Male   | No          | No          | No               | 3≈5           | 5≈10        | No drinking     | Atorvastatin   | Standard    | No             |
| 240 | 80≈85 | Male   | No          | No          | No               | 3≈5           | 5≈10        | No drinking     | Fluvastatin    | Standard    | No             |
| 241 | 80≈85 | Male   | No          | Yes         | No               | 3≈5           | <5          | No drinking     | Simvastatin    | Standard    | No             |
| 242 | 80≈85 | Male   | No          | No          | No               | ≥5            | 5≈10        | No drinking     | Simvastatin    | Low         | No             |
| 243 | 80≈85 | Male   | No          | No          | No               | ≤2            | 5≈10        | No drinking     | Atorvastatin   | Standard    | No             |
| 244 | 80≈85 | Male   | No          | No          | No               | ≤2            | 5≈10        | No drinking     | Simvastatin    | Standard    | No             |
| 245 | 80≈85 | Male   | No          | No          | No               | 3≈5           | 5≈10        | No drinking     | Atorvastatin   | Standard    | No             |
| 246 | 85≈90 | Male   | No          | No          | Yes              | ≥5            | 5≈10        | No drinking     | Fluvastatin    | Standard    | No             |
| 247 | ≥90   | Male   | No          | Yes         | Yes              | ≥5            | 5≈10        | No drinking     | Pravastatin    | Standard    | No             |
| 248 | 80≈85 | Female | No          | No          | No               | 3≈5           | 5≈10        | No drinking     | Atorvastatin   | Low         | No             |
| 249 | 80≈85 | Male   | No          | No          | No               | 3≈5           | 5≈10        | No drinking     | Simvastatin    | Low         | No             |
| 250 | 80≈85 | Male   | No          | No          | No               | 3≈5           | 5≈10        | No drinking     | Atorvastatin   | Standard    | No             |
| 251 | 80≈85 | Female | No          | No          | No               | ≥5            | 5≈10        | No drinking     | Fluvastatin    | Standard    | No             |
| 252 | 80≈85 | Male   | No          | No          | Yes              | ≥5            | 5≈10        | No drinking     | Pravastatin    | Standard    | No             |
| 253 | 80≈85 | Female | No          | No          | No               | 3≈5           | <5          | No drinking     | Fluvastatin    | Standard    | No             |
| 254 | 80≈85 | Female | No          | No          | No               | 3≈5           | 5≈10        | No drinking     | Atorvastatin   | Low         | No             |
| 255 | ≥90   | Male   | No          | No          | No               | 3≈5           | 5≈10        | No drinking     | Fluvastatin    | Standard    | No             |
| 256 | 85≈90 | Male   | No          | No          | No               | ≥5            | 5≈10        | No drinking     | Atorvastatin   | Low         | No             |
| 257 | 85≈90 | Male   | No          | No          | No               | ≥5            | 5≈10        | No drinking     | Simvastatin    | Standard    | No             |
| 258 | 80≈85 | Male   | No          | No          | Yes              | ≥5            | 5≈10        | No drinking     | Fluvastatin    | Standard    | No             |
| 259 | 80≈85 | Male   | No          | No          | No               | ≤2            | <5          | No drinking     | Rosuvastatin   | Standard    | No             |
| 260 | ≥90   | Female | No          | No          | No               | ≥5            | 5≈10        | No drinking     | Atorvastatin   | Low         | No             |
| 261 | 85≈90 | Male   | No          | No          | Yes              | ≥5            | 5≈10        | No drinking     | Fluvastatin    | Standard    | No             |
| 262 | 80≈85 | Female | No          | No          | No               | ≤2            | 5≈10        | No drinking     | Rosuvastatin   | Standard    | No             |
| 263 | 80≈85 | Male   | No          | No          | Yes              | ≥5            | 5≈10        | No drinking     | Atorvastatin   | Standard    | No             |
| 264 | 80≈85 | Male   | No          | No          | No               | ≥5            | 5≈10        | No drinking     | Fluvastatin    | Standard    | No             |
| 265 | 80≈85 | Male   | No          | No          | No               | 3≈5           | <5          | No drinking     | Simvastatin    | Standard    | No             |
| 266 | 80≈85 | Male   | No          | No          | No               | ≥5            | 5≈10        | No drinking     | Fluvastatin    | Standard    | No             |
| 267 | 80≈85 | Female | No          | No          | No               | 3≈5           | 5≈10        | No drinking     | Fluvastatin    | Standard    | No             |
| 268 | 80≈85 | Male   | No          | No          | No               | ≥5            | 5≈10        | No drinking     | Atorvastatin   | Standard    | No             |
| 269 | 80≈85 | Male   | No          | No          | No               | ≥5            | 5≈10        | No drinking     | Fluvastatin    | Standard    | No             |
| 270 | 80≈85 | Male   | No          | No          | Yes              | 3≈5           | 5≈10        | No drinking     | Fluvastatin    | Standard    | No             |
| 271 | 80≈85 | Male   | No          | No          | No               | 3≈5           | 5≈10        | No drinking     | Atorvastatin   | Low         | No             |
| 272 | 85≈90 | Female | No          | No          | No               | 3≈5           | <5          | No drinking     | Pravastatin    | Standard    | No             |
| 273 | ≥90   | Male   | No          | Yes         | No               | ≥5            | 5≈10        | No drinking     | Atorvastatin   | Low         | No             |
| 274 | 80≈85 | Male   | No          | No          | Yes              | 3≈5           | 5≈10        | No drinking     | Rosuvastatin   | Low         | No             |
| 275 | 80≈85 | Male   | No          | No          | No               | 3≈5           | 5≈10        | No drinking     | Rosuvastatin   | Standard    | No             |
| 276 | 80≈85 | Male   | No          | No          | No               | ≥5            | 5≈10        | No drinking     | Atorvastatin   | Standard    | No             |
| 277 | 80≈85 | Female | No          | Yes         | No               | ≥5            | 5≈10        | No drinking     | Pravastatin    | Standard    | No             |
| 278 | 85≈90 | Male   | No          | No          | No               | 3≈5           | 5≈10        | No drinking     | Rosuvastatin   | Standard    | No             |
| 279 | 85≈90 | Male   | No          | No          | No               | ≤2            | 5≈10        | No drinking     | Atorvastatin   | Standard    | No             |
| 280 | 80≈85 | Female | No          | No          | No               | 3≈5           | 5≈10        | No drinking     | Simvastatin    | Standard    | No             |
| 281 | 80≈85 | Male   | No          | No          | No               | 3≈5           | <5          | No drinking     | Pravastatin    | Standard    | No             |
| 282 | 85≈90 | Male   | No          | No          | No               | ≤2            | <5          | No drinking     | Atorvastatin   | Low         | No             |

| No. | Age   | Sex    | Hepatitis B | Fatty Liver | Biliary calculus | Complications | Other drugs | Drinking habits | Statin variety | Statin dose | Hepatic damage |
|-----|-------|--------|-------------|-------------|------------------|---------------|-------------|-----------------|----------------|-------------|----------------|
| 283 | 85≈90 | Male   | No          | No          | No               | ≤2            | <5          | No drinking     | Rosuvastatin   | Standard    | No             |
| 284 | 80≈85 | Male   | No          | No          | No               | 3≈5           | 5≈10        | No drinking     | Fluvastatin    | Standard    | No             |
| 285 | 80≈85 | Male   | No          | Yes         | No               | 3≈5           | 5≈10        | No drinking     | Pravastatin    | Standard    | No             |
| 286 | 85≈90 | Male   | No          | No          | No               | 3≈5           | 5≈10        | No drinking     | Atorvastatin   | Low         | No             |
| 287 | 85≈90 | Male   | No          | No          | No               | ≤2            | 5≈10        | No drinking     | Rosuvastatin   | Standard    | No             |
| 288 | 85≈90 | Male   | No          | No          | No               | 3≈5           | 5≈10        | No drinking     | Pravastatin    | Standard    | No             |
| 289 | 80≈85 | Female | No          | No          | No               | ≥5            | 5≈10        | No drinking     | Atorvastatin   | Standard    | No             |
| 290 | 80≈85 | Male   | No          | Yes         | No               | ≥5            | 5≈10        | No drinking     | Rosuvastatin   | Low         | No             |
| 291 | 85≈90 | Male   | No          | No          | No               | ≥5            | 5≈10        | No drinking     | Atorvastatin   | Standard    | No             |
| 292 | 85≈90 | Female | No          | Yes         | No               | ≥5            | 5≈10        | No drinking     | Simvastatin    | Standard    | No             |
| 293 | ≥90   | Male   | Yes         | No          | No               | 3≈5           | 5≈10        | No drinking     | Fluvastatin    | Standard    | No             |
| 294 | 85≈90 | Female | No          | No          | No               | ≤2            | <5          | No drinking     | Simvastatin    | Standard    | No             |
| 295 | 85≈90 | Male   | No          | No          | No               | ≥5            | 5≈10        | No drinking     | Atorvastatin   | Low         | No             |
| 296 | 80≈85 | Male   | No          | No          | No               | 3≈5           | <5          | No drinking     | Fluvastatin    | Standard    | No             |
| 297 | 80≈85 | Male   | No          | No          | No               | ≥5            | 5≈10        | No drinking     | Rosuvastatin   | Standard    | No             |
| 298 | 80≈85 | Male   | No          | Yes         | No               | ≥5            | 5≈10        | No drinking     | Pravastatin    | Standard    | No             |
| 299 | 85≈90 | Male   | No          | No          | No               | ≥5            | 5≈10        | No drinking     | Atorvastatin   | Low         | No             |
| 300 | 80≈85 | Female | No          | No          | No               | ≥5            | 5≈10        | No drinking     | Fluvastatin    | Standard    | No             |
| 301 | 80≈85 | Male   | No          | No          | No               | 3≈5           | 5≈10        | No drinking     | Fluvastatin    | Standard    | No             |
| 302 | ≥90   | Male   | No          | No          | No               | 3≈5           | <5          | No drinking     | Fluvastatin    | Standard    | No             |
| 303 | 80≈85 | Male   | No          | No          | No               | 3≈5           | <5          | No drinking     | Pravastatin    | Standard    | No             |
| 304 | 80≈85 | Male   | No          | No          | No               | 3≈5           | <5          | No drinking     | Rosuvastatin   | Standard    | No             |
| 305 | 85≈90 | Male   | No          | No          | Yes              | ≥5            | 5≈10        | No drinking     | Fluvastatin    | Standard    | No             |
| 306 | 85≈90 | Male   | No          | No          | Yes              | ≥5            | 5≈10        | No drinking     | Pravastatin    | Standard    | No             |
| 307 | 80≈85 | Male   | No          | No          | No               | ≥5            | 5≈10        | No drinking     | Atorvastatin   | Standard    | No             |
| 308 | 80≈85 | Female | No          | No          | No               | ≥5            | ≥10         | No drinking     | Fluvastatin    | Standard    | No             |
| 309 | 80≈85 | Female | No          | No          | No               | ≥5            | ≥10         | No drinking     | Rosuvastatin   | Low         | No             |
| 310 | 80≈85 | Male   | No          | No          | No               | 3≈5           | 5≈10        | No drinking     | Atorvastatin   | Low         | No             |
| 311 | 85≈90 | Male   | No          | No          | No               | 3≈5           | 5≈10        | No drinking     | Simvastatin    | Standard    | No             |
| 312 | 80≈85 | Female | No          | No          | No               | ≤2            | 5≈10        | No drinking     | Fluvastatin    | Standard    | No             |
| 313 | ≥90   | Male   | No          | No          | No               | ≥5            | <5          | No drinking     | Rosuvastatin   | Standard    | No             |
| 314 | 80≈85 | Female | No          | No          | Yes              | ≥5            | 5≈10        | No drinking     | Atorvastatin   | Standard    | No             |
| 315 | 85≈90 | Male   | No          | No          | No               | 3≈5           | <5          | No drinking     | Fluvastatin    | Standard    | No             |
| 316 | 80≈85 | Male   | No          | No          | No               | ≥5            | 5≈10        | No drinking     | Pravastatin    | Standard    | No             |
| 317 | 80≈85 | Male   | No          | No          | No               | 3≈5           | 5≈10        | No drinking     | Atorvastatin   | Standard    | No             |
| 318 | 80≈85 | Male   | No          | No          | No               | 3≈5           | 5≈10        | No drinking     | Simvastatin    | Low         | No             |
| 319 | 80≈85 | Male   | No          | No          | Yes              | ≥5            | 5≈10        | No drinking     | Fluvastatin    | Standard    | No             |
| 320 | 85≈90 | Male   | No          | No          | No               | ≥5            | <5          | No drinking     | Atorvastatin   | Standard    | No             |
| 321 | 80≈85 | Male   | No          | No          | No               | ≥5            | 5≈10        | No drinking     | Fluvastatin    | Standard    | No             |
| 322 | 80≈85 | Male   | No          | Yes         | No               | 3≈5           | 5≈10        | No drinking     | Fluvastatin    | Standard    | No             |
| 323 | 85≈90 | Male   | No          | No          | No               | ≥5            | 5≈10        | No drinking     | Atorvastatin   | Low         | No             |
| 324 | 85≈90 | Male   | No          | No          | No               | ≤2            | 5≈10        | No drinking     | Fluvastatin    | Standard    | No             |
| 325 | 80≈85 | Male   | No          | No          | Yes              | ≥5            | 5≈10        | No drinking     | Pravastatin    | Standard    | No             |
| 326 | 85≈90 | Male   | No          | No          | No               | 3≈5           | <5          | No drinking     | Rosuvastatin   | Low         | No             |
| 327 | 80≈85 | Male   | No          | No          | No               | 3≈5           | 5≈10        | No drinking     | Atorvastatin   | Standard    | No             |
| 328 | 80≈85 | Male   | No          | No          | No               | ≥5            | 5≈10        | No drinking     | Pravastatin    | Standard    | No             |
| 329 | 80≈85 | Male   | No          | Yes         | Yes              | ≥5            | 5≈10        | No drinking     | Atorvastatin   | Standard    | No             |

| No. | Age   | Sex    | Hepatitis B | Fatty Liver | Biliary calculus | Complications | Other drugs | Drinking habits | Statin variety | Statin dose | Hepatic damage |
|-----|-------|--------|-------------|-------------|------------------|---------------|-------------|-----------------|----------------|-------------|----------------|
| 330 | 80≈85 | Male   | No          | No          | No               | ≥5            | <5          | No drinking     | Simvastatin    | Low         | No             |
| 331 | 80≈85 | Female | No          | No          | No               | ≥5            | 5≈10        | No drinking     | Fluvastatin    | Standard    | No             |
| 332 | 80≈85 | Male   | No          | No          | Yes              | ≥5            | 5≈10        | No drinking     | Simvastatin    | Standard    | No             |
| 333 | 80≈85 | Male   | No          | No          | Yes              | ≥5            | 5≈10        | No drinking     | Rosuvastatin   | Standard    | No             |
| 334 | 80≈85 | Male   | No          | No          | No               | ≥5            | 5≈10        | No drinking     | Atorvastatin   | Standard    | No             |
| 335 | 80≈85 | Male   | No          | No          | No               | ≥5            | 5≈10        | No drinking     | Fluvastatin    | Standard    | No             |
| 336 | 85≈90 | Male   | No          | No          | No               | ≥5            | 5≈10        | No drinking     | Fluvastatin    | Standard    | No             |
| 337 | 80≈85 | Female | No          | No          | No               | 3≈5           | <5          | No drinking     | Pravastatin    | Standard    | No             |
| 338 | ≥90   | Male   | No          | No          | No               | 3≈5           | <5          | No drinking     | Fluvastatin    | Standard    | No             |
| 339 | 80≈85 | Male   | No          | Yes         | Yes              | ≥5            | 5≈10        | No drinking     | Fluvastatin    | Standard    | No             |
| 340 | 80≈85 | Male   | No          | No          | No               | ≥5            | 5≈10        | No drinking     | Pravastatin    | Standard    | No             |
| 341 | 80≈85 | Male   | No          | No          | Yes              | 3≈5           | 5≈10        | No drinking     | Atorvastatin   | Standard    | No             |
| 342 | 80≈85 | Male   | No          | No          | Yes              | ≥5            | 5≈10        | No drinking     | Fluvastatin    | Standard    | No             |
| 343 | 85≈90 | Male   | No          | No          | Yes              | ≥5            | 5≈10        | No drinking     | Pravastatin    | Standard    | No             |
| 344 | 80≈85 | Male   | No          | No          | No               | ≤2            | <5          | No drinking     | Pravastatin    | Standard    | No             |
| 345 | 80≈85 | Male   | No          | Yes         | Yes              | ≥5            | 5≈10        | No drinking     | Rosuvastatin   | Low         | No             |
| 346 | 80≈85 | Female | No          | No          | No               | ≥5            | 5≈10        | No drinking     | Fluvastatin    | Standard    | No             |
| 347 | 85≈90 | Female | No          | No          | No               | ≥5            | 5≈10        | No drinking     | Atorvastatin   | Standard    | No             |
| 348 | 80≈85 | Male   | No          | No          | No               | ≥5            | <5          | No drinking     | Fluvastatin    | Standard    | No             |
| 349 | 80≈85 | Male   | No          | No          | No               | 3≈5           | 5≈10        | No drinking     | Atorvastatin   | Standard    | No             |
| 350 | ≥90   | Male   | No          | Yes         | No               | ≥5            | 5≈10        | No drinking     | Simvastatin    | Standard    | No             |
| 351 | 80≈85 | Male   | No          | No          | No               | 3≈5           | 5≈10        | No drinking     | Atorvastatin   | Standard    | No             |
| 352 | 80≈85 | Female | No          | No          | No               | 3≈5           | 5≈10        | No drinking     | Simvastatin    | Standard    | No             |
| 353 | 80≈85 | Male   | Yes         | No          | Yes              | ≥5            | 5≈10        | No drinking     | Fluvastatin    | Standard    | No             |
| 354 | 80≈85 | Male   | No          | No          | No               | ≥5            | 5≈10        | No drinking     | Pravastatin    | Standard    | No             |
| 355 | 80≈85 | Female | No          | No          | No               | 3≈5           | 5≈10        | No drinking     | Rosuvastatin   | Standard    | No             |
| 356 | 80≈85 | Female | No          | No          | Yes              | 3≈5           | 5≈10        | No drinking     | Fluvastatin    | Standard    | No             |
| 357 | 80≈85 | Female | No          | No          | Yes              | 3≈5           | 5≈10        | No drinking     | Atorvastatin   | Standard    | No             |
| 358 | ≥90   | Male   | No          | No          | No               | ≥5            | 5≈10        | No drinking     | Fluvastatin    | Standard    | No             |
| 359 | 85≈90 | Male   | No          | No          | No               | 3≈5           | 5≈10        | No drinking     | Pravastatin    | Standard    | No             |
| 360 | ≥90   | Male   | No          | No          | No               | 3≈5           | 5≈10        | No drinking     | Fluvastatin    | Standard    | No             |
| 361 | 80≈85 | Male   | No          | No          | No               | ≥5            | 5≈10        | No drinking     | Atorvastatin   | Standard    | No             |
| 362 | 80≈85 | Male   | No          | No          | No               | 3≈5           | <5          | No drinking     | Fluvastatin    | Standard    | No             |
| 363 | 85≈90 | Male   | No          | No          | No               | ≥5            | 5≈10        | No drinking     | Fluvastatin    | Standard    | No             |
| 364 | 85≈90 | Male   | No          | No          | No               | ≥5            | 5≈10        | No drinking     | Simvastatin    | Standard    | No             |
| 365 | ≥90   | Male   | No          | No          | No               | ≥5            | 5≈10        | No drinking     | Fluvastatin    | Standard    | No             |
| 366 | 80≈85 | Male   | No          | No          | No               | ≥5            | 5≈10        | No drinking     | Fluvastatin    | Standard    | No             |
| 367 | 80≈85 | Male   | No          | Yes         | No               | ≥5            | 5≈10        | No drinking     | Fluvastatin    | Standard    | No             |
| 368 | 80≈85 | Male   | No          | Yes         | No               | ≥5            | 5≈10        | No drinking     | Pravastatin    | Low         | No             |
| 369 | 85≈90 | Male   | No          | Yes         | No               | 3≈5           | 5≈10        | No drinking     | Rosuvastatin   | Standard    | No             |
| 370 | 80≈85 | Male   | No          | No          | No               | 3≈5           | <5          | No drinking     | Atorvastatin   | Low         | No             |
| 371 | 85≈90 | Male   | No          | No          | No               | ≥5            | 5≈10        | No drinking     | Simvastatin    | Standard    | No             |
| 372 | 85≈90 | Male   | No          | No          | No               | ≥5            | ≥10         | No drinking     | Simvastatin    | Standard    | No             |
| 373 | 85≈90 | Male   | No          | No          | No               | ≥5            | ≥10         | No drinking     | Fluvastatin    | Standard    | No             |
| 374 | 80≈85 | Male   | No          | No          | Yes              | ≥5            | ≥10         | No drinking     | Simvastatin    | Standard    | No             |
| 375 | 85≈90 | Male   | No          | No          | No               | ≥5            | ≥10         | No drinking     | Atorvastatin   | Low         | No             |
| 376 | 85≈90 | Male   | No          | No          | No               | ≤2            | 5≈10        | No drinking     | Simvastatin    | Standard    | No             |



| No. | Age   | Sex    | Hepatitis B | Fatty Liver | Biliary calculus | Complications | Other drugs | Drinking habits  | Statin variety | Statin dose | Hepatic damage |
|-----|-------|--------|-------------|-------------|------------------|---------------|-------------|------------------|----------------|-------------|----------------|
| 377 | 80≈85 | Male   | No          | No          | No               | ≥5            | ≥10         | No drinking      | Atorvastatin   | Standard    | No             |
| 378 | 80≈85 | Male   | No          | No          | No               | ≥5            | ≥10         | No drinking      | Simvastatin    | Standard    | No             |
| 379 | 80≈85 | Male   | No          | No          | No               | ≥5            | ≥10         | No drinking      | Atorvastatin   | Standard    | No             |
| 380 | 80≈85 | Male   | No          | No          | No               | ≥5            | ≥10         | No drinking      | Rosuvastatin   | Standard    | No             |
| 381 | 85≈90 | Male   | No          | No          | No               | 3≈5           | ≥10         | No drinking      | Atorvastatin   | Standard    | No             |
| 382 | 80≈85 | Female | No          | No          | No               | 3≈5           | 5≈10        | No drinking      | Simvastatin    | Standard    | No             |
| 383 | 80≈85 | Male   | No          | No          | No               | 3≈5           | 5≈10        | No drinking      | Atorvastatin   | Standard    | No             |
| 384 | 80≈85 | Female | No          | No          | No               | ≤2            | 5≈10        | No drinking      | Rosuvastatin   | Low         | No             |
| 385 | 80≈85 | Male   | No          | No          | No               | 3≈5           | 5≈10        | No drinking      | Atorvastatin   | Standard    | No             |
| 386 | 80≈85 | Female | No          | No          | No               | 3≈5           | 5≈10        | No drinking      | Rosuvastatin   | Standard    | No             |
| 387 | 85≈90 | Female | No          | No          | No               | ≤2            | 5≈10        | No drinking      | Simvastatin    | Standard    | No             |
| 388 | 85≈90 | Male   | No          | No          | No               | 3≈5           | 5≈10        | No drinking      | Pravastatin    | Standard    | No             |
| 389 | 80≈85 | Female | No          | No          | No               | ≥5            | 5≈10        | No drinking      | Atorvastatin   | Standard    | No             |
| 390 | 80≈85 | Male   | No          | No          | No               | ≥5            | ≥10         | No drinking      | Fluvastatin    | Standard    | No             |
| 391 | 85≈90 | Female | No          | No          | No               | ≥5            | 5≈10        | No drinking      | Simvastatin    | Standard    | No             |
| 392 | 85≈90 | Male   | No          | No          | No               | 3≈5           | 5≈10        | No drinking      | Atorvastatin   | Standard    | No             |
| 393 | ≥90   | Male   | No          | No          | No               | ≥5            | ≥10         | No drinking      | Simvastatin    | Standard    | No             |
| 394 | 80≈85 | Male   | No          | No          | No               | ≥5            | 5≈10        | No drinking      | Simvastatin    | Low         | No             |
| 395 | 80≈85 | Male   | No          | No          | No               | 3≈5           | ≥10         | No drinking      | Rosuvastatin   | Standard    | No             |
| 396 | 85≈90 | Male   | No          | No          | Yes              | ≥5            | ≥10         | No drinking      | Atorvastatin   | Standard    | No             |
| 397 | 85≈90 | Male   | No          | No          | No               | 3≈5           | 5≈10        | No drinking      | Rosuvastatin   | Standard    | No             |
| 398 | 80≈85 | Male   | No          | No          | No               | ≥5            | 5≈10        | No drinking      | Atorvastatin   | Standard    | No             |
| 399 | 85≈90 | Male   | No          | No          | No               | 3≈5           | 5≈10        | No drinking      | Simvastatin    | Standard    | No             |
| 400 | 80≈85 | Male   | No          | Yes         | No               | 3≈5           | 5≈10        | No drinking      | Atorvastatin   | Standard    | No             |
| 401 | ≥90   | Male   | No          | No          | No               | 3≈5           | 5≈10        | No drinking      | Rosuvastatin   | Standard    | No             |
| 402 | 80≈85 | Male   | No          | No          | No               | ≥5            | ≥10         | No drinking      | Pravastatin    | Standard    | No             |
| 403 | 85≈90 | Male   | No          | No          | No               | 3≈5           | ≥10         | No drinking      | Pravastatin    | Standard    | No             |
| 404 | 80≈85 | Female | No          | No          | No               | 3≈5           | ≥10         | No drinking      | Atorvastatin   | Standard    | No             |
| 405 | 85≈90 | Female | No          | No          | No               | 3≈5           | 5≈10        | No drinking      | Simvastatin    | Standard    | No             |
| 406 | 80≈85 | Female | No          | No          | No               | 3≈5           | 5≈10        | No drinking      | Atorvastatin   | Standard    | No             |
| 407 | 80≈85 | Female | No          | No          | No               | 3≈5           | 5≈10        | No drinking      | Simvastatin    | Standard    | No             |
| 408 | 80≈85 | Female | No          | No          | No               | 3≈5           | 5≈10        | No drinking      | Rosuvastatin   | Standard    | No             |
| 409 | 80≈85 | Male   | No          | Yes         | No               | ≤2            | 5≈10        | No drinking      | Pravastatin    | Standard    | No             |
| 410 | 80≈85 | Male   | No          | No          | No               | 3≈5           | 5≈10        | No drinking      | Atorvastatin   | Standard    | No             |
| 411 | 85≈90 | Male   | No          | Yes         | No               | 3≈5           | <5          | Heavy drinking   | Rosuvastatin   | Standard    | No             |
| 412 | 80≈85 | Female | No          | No          | No               | ≤2            | 5≈10        | No drinking      | Pravastatin    | Standard    | No             |
| 413 | 80≈85 | Female | No          | No          | Yes              | 3≈5           | 5≈10        | No drinking      | Pravastatin    | Standard    | No             |
| 414 | 80≈85 | Female | No          | No          | No               | ≤2            | <5          | No drinking      | Rosuvastatin   | Low         | No             |
| 415 | 80≈85 | Male   | No          | No          | Yes              | 3≈5           | <5          | Mild to moderate | Rosuvastatin   | Standard    | No             |
| 416 | 80≈85 | Male   | No          | No          | No               | 3≈5           | 5≈10        | No drinking      | Pravastatin    | Standard    | No             |
| 417 | 80≈85 | Male   | No          | No          | No               | ≤2            | 5≈10        | No drinking      | Rosuvastatin   | Low         | No             |
| 418 | 85≈90 | Male   | No          | No          | No               | ≤2            | 5≈10        | No drinking      | Pravastatin    | Standard    | No             |
| 419 | 85≈90 | Male   | No          | No          | No               | 3≈5           | 5≈10        | No drinking      | Pravastatin    | Standard    | No             |
| 420 | 80≈85 | Male   | No          | No          | No               | ≤2            | 5≈10        | No drinking      | Rosuvastatin   | Standard    | No             |
| 421 | 85≈90 | Male   | No          | Yes         | Yes              | ≤2            | 5≈10        | No drinking      | Rosuvastatin   | Low         | No             |
| 422 | 80≈85 | Male   | No          | Yes         | No               | 3≈5           | ≥10         | No drinking      | Pravastatin    | Standard    | No             |
| 423 | 85≈90 | Male   | No          | No          | Yes              | ≥5            | ≥10         | No drinking      | Atorvastatin   | Standard    | No             |

| No. | Age   | Sex    | Hepatitis B | Fatty Liver | Biliary calculus | Complications | Other drugs | Drinking habits | Statin variety | Statin dose | Hepatic damage |
|-----|-------|--------|-------------|-------------|------------------|---------------|-------------|-----------------|----------------|-------------|----------------|
| 424 | 80≈85 | Female | No          | No          | No               | ≥5            | ≥10         | No drinking     | Rosuvastatin   | Standard    | No             |
| 425 | 85≈90 | Male   | No          | No          | No               | ≥5            | ≥10         | No drinking     | Pravastatin    | Standard    | No             |
| 426 | 80≈85 | Male   | No          | Yes         | Yes              | ≥5            | ≥10         | No drinking     | Atorvastatin   | Standard    | No             |
| 427 | 80≈85 | Male   | No          | No          | No               | ≥5            | 5≈10        | No drinking     | Simvastatin    | Standard    | No             |
| 428 | 85≈90 | Female | No          | No          | No               | 3≈5           | 5≈10        | No drinking     | Rosuvastatin   | Standard    | No             |
| 429 | 85≈90 | Male   | No          | No          | No               | 3≈5           | 5≈10        | No drinking     | Atorvastatin   | Standard    | No             |
| 430 | 85≈90 | Female | No          | No          | No               | ≥5            | 5≈10        | No drinking     | Pravastatin    | Low         | No             |
| 431 | 80≈85 | Male   | No          | Yes         | No               | 3≈5           | <5          | No drinking     | Rosuvastatin   | Standard    | No             |
| 432 | 80≈85 | Male   | No          | No          | Yes              | ≥5            | 5≈10        | No drinking     | Atorvastatin   | Standard    | No             |
| 433 | 85≈90 | Female | No          | No          | No               | 3≈5           | 5≈10        | No drinking     | Rosuvastatin   | Standard    | No             |
| 434 | 80≈85 | Female | No          | No          | No               | ≥5            | ≥10         | No drinking     | Atorvastatin   | Standard    | No             |
| 435 | 85≈90 | Male   | No          | No          | No               | ≥5            | ≥10         | No drinking     | Rosuvastatin   | Standard    | No             |
| 436 | 80≈85 | Male   | No          | Yes         | Yes              | ≥5            | ≥10         | No drinking     | Atorvastatin   | Standard    | No             |
| 437 | 80≈85 | Female | No          | Yes         | No               | 3≈5           | <5          | No drinking     | Pravastatin    | Standard    | No             |
| 438 | 80≈85 | Female | No          | No          | No               | 3≈5           | <5          | No drinking     | Rosuvastatin   | Low         | No             |
| 439 | 80≈85 | Female | No          | No          | No               | 3≈5           | 5≈10        | No drinking     | Pravastatin    | Low         | No             |
| 440 | 80≈85 | Female | No          | No          | No               | 3≈5           | 5≈10        | No drinking     | Rosuvastatin   | Standard    | No             |
| 441 | 85≈90 | Female | No          | No          | No               | 3≈5           | 5≈10        | No drinking     | Atorvastatin   | Standard    | No             |
| 442 | 80≈85 | Male   | No          | No          | No               | ≤2            | 5≈10        | No drinking     | Pravastatin    | Standard    | No             |
| 443 | 80≈85 | Female | No          | No          | No               | 3≈5           | 5≈10        | No drinking     | Pravastatin    | Standard    | No             |
| 444 | 80≈85 | Female | Yes         | No          | No               | ≥5            | 5≈10        | No drinking     | Rosuvastatin   | Standard    | No             |
| 445 | 85≈90 | Male   | Yes         | Yes         | No               | ≥5            | 5≈10        | No drinking     | Atorvastatin   | Standard    | No             |
| 446 | 85≈90 | Male   | Yes         | Yes         | No               | ≥5            | 5≈10        | No drinking     | Fluvastatin    | Standard    | No             |
| 447 | 85≈90 | Male   | No          | Yes         | No               | ≥5            | ≥10         | No drinking     | Rosuvastatin   | Low         | No             |
| 448 | 80≈85 | Male   | No          | No          | Yes              | 3≈5           | ≥10         | No drinking     | Pravastatin    | Standard    | No             |
| 449 | ≥90   | Male   | No          | No          | No               | 3≈5           | 5≈10        | No drinking     | Pravastatin    | Standard    | No             |
| 450 | 80≈85 | Male   | No          | No          | No               | ≥5            | 5≈10        | No drinking     | Rosuvastatin   | Standard    | No             |
| 451 | 80≈85 | Male   | No          | No          | No               | 3≈5           | ≥10         | No drinking     | Pravastatin    | Standard    | No             |
| 452 | 85≈90 | Male   | No          | No          | No               | 3≈5           | 5≈10        | No drinking     | Rosuvastatin   | Low         | No             |
| 453 | 80≈85 | Male   | No          | No          | No               | ≥5            | ≥10         | No drinking     | Pravastatin    | Standard    | No             |
| 454 | 85≈90 | Male   | No          | No          | No               | 3≈5           | ≥10         | No drinking     | Rosuvastatin   | Low         | No             |
| 455 | 80≈85 | Female | No          | No          | No               | ≥5            | ≥10         | No drinking     | Pravastatin    | Low         | No             |
| 456 | 80≈85 | Female | No          | No          | No               | ≥5            | ≥10         | No drinking     | Rosuvastatin   | Standard    | No             |
| 457 | 85≈90 | Male   | No          | No          | No               | ≥5            | ≥10         | No drinking     | Pravastatin    | Standard    | No             |
| 458 | 80≈85 | Male   | No          | No          | No               | ≥5            | ≥10         | No drinking     | Rosuvastatin   | Standard    | No             |
| 459 | 85≈90 | Male   | No          | No          | No               | ≥5            | ≥10         | No drinking     | Atorvastatin   | Standard    | No             |
| 460 | 80≈85 | Male   | No          | No          | No               | 3≈5           | ≥10         | Heavy drinking  | Rosuvastatin   | Standard    | No             |
| 461 | 85≈90 | Male   | No          | No          | No               | 3≈5           | 5≈10        | No drinking     | Pravastatin    | Standard    | No             |
| 462 | ≥90   | Male   | No          | No          | No               | ≥5            | ≥10         | No drinking     | Rosuvastatin   | Standard    | No             |
| 463 | 80≈85 | Male   | No          | No          | No               | ≥5            | 5≈10        | No drinking     | Pravastatin    | Standard    | No             |
| 464 | 85≈90 | Male   | No          | No          | No               | ≥5            | 5≈10        | No drinking     | Atorvastatin   | Standard    | No             |
| 465 | 85≈90 | Female | No          | No          | No               | ≥5            | 5≈10        | No drinking     | Rosuvastatin   | Standard    | No             |
| 466 | 85≈90 | Male   | No          | No          | No               | 3≈5           | 5≈10        | No drinking     | Rosuvastatin   | Standard    | No             |
| 467 | 80≈85 | Male   | No          | No          | No               | 3≈5           | 5≈10        | No drinking     | Rosuvastatin   | Standard    | No             |
| 468 | ≥90   | Male   | No          | No          | No               | ≥5            | 5≈10        | No drinking     | Pravastatin    | Low         | No             |
| 469 | 80≈85 | Female | No          | No          | Yes              | ≥5            | 5≈10        | No drinking     | Pravastatin    | Standard    | No             |
| 470 | 85≈90 | Male   | No          | No          | No               | ≤2            | <5          | No drinking     | Atorvastatin   | Standard    | No             |

| No. | Age   | Sex    | Hepatitis B | Fatty Liver | Biliary calculus | Complications | Other drugs | Drinking habits  | Statin variety | Statin dose | Hepatic damage |
|-----|-------|--------|-------------|-------------|------------------|---------------|-------------|------------------|----------------|-------------|----------------|
| 471 | 80≈85 | Male   | No          | No          | No               | 3≈5           | 5≈10        | No drinking      | Rosuvastatin   | Standard    | No             |
| 472 | 80≈85 | Female | No          | No          | No               | 3≈5           | ≥10         | No drinking      | Atorvastatin   | Standard    | No             |
| 473 | 80≈85 | Female | No          | No          | No               | 3≈5           | 5≈10        | No drinking      | Rosuvastatin   | Standard    | No             |
| 474 | 85≈90 | Male   | No          | No          | Yes              | ≥5            | ≥10         | No drinking      | Rosuvastatin   | Standard    | No             |
| 475 | 80≈85 | Male   | No          | No          | No               | ≥5            | ≥10         | No drinking      | Rosuvastatin   | Standard    | No             |
| 476 | 80≈85 | Male   | Yes         | Yes         | No               | ≥5            | <5          | Heavy drinking   | Simvastatin    | Standard    | No             |
| 477 | 80≈85 | Male   | Yes         | Yes         | Yes              | ≥5            | 5≈10        | Heavy drinking   | Pravastatin    | Standard    | No             |
| 478 | 80≈85 | Male   | Yes         | No          | No               | 3≈5           | <5          | No drinking      | Simvastatin    | Standard    | No             |
| 479 | 80≈85 | Female | Yes         | Yes         | No               | ≥5            | 5≈10        | No drinking      | Simvastatin    | Standard    | No             |
| 480 | 80≈85 | Male   | No          | No          | No               | 3≈5           | ≥10         | Mild to moderate | Rosuvastatin   | Standard    | No             |
| 481 | 80≈85 | Male   | No          | No          | No               | 3≈5           | 5≈10        | Heavy drinking   | Pravastatin    | Standard    | No             |
| 482 | 85≈90 | Male   | No          | No          | No               | ≥5            | 5≈10        | No drinking      | Pravastatin    | Low         | No             |
| 483 | 80≈85 | Male   | No          | No          | No               | 3≈5           | 5≈10        | No drinking      | Rosuvastatin   | Standard    | No             |
| 484 | ≥90   | Male   | No          | No          | No               | 3≈5           | <5          | No drinking      | Pravastatin    | Standard    | No             |
| 485 | 80≈85 | Male   | No          | No          | Yes              | ≥5            | <5          | No drinking      | Rosuvastatin   | Standard    | No             |
| 486 | 80≈85 | Male   | No          | No          | Yes              | 3≈5           | 5≈10        | No drinking      | Rosuvastatin   | Standard    | No             |
| 487 | 80≈85 | Male   | No          | No          | No               | 3≈5           | 5≈10        | No drinking      | Simvastatin    | Standard    | No             |
| 488 | 85≈90 | Female | No          | No          | Yes              | ≥5            | 5≈10        | No drinking      | Pravastatin    | Standard    | No             |
| 489 | 80≈85 | Female | No          | No          | No               | ≥5            | 5≈10        | No drinking      | Rosuvastatin   | Low         | No             |
| 490 | 80≈85 | Male   | No          | No          | Yes              | ≥5            | 5≈10        | No drinking      | Rosuvastatin   | Standard    | No             |
| 491 | 80≈85 | Female | No          | No          | Yes              | ≥5            | ≥10         | No drinking      | Pravastatin    | Low         | No             |
| 492 | 80≈85 | Male   | Yes         | Yes         | Yes              | ≥5            | 5≈10        | Heavy drinking   | Simvastatin    | Standard    | Yes            |
| 493 | 80≈85 | Male   | Yes         | No          | Yes              | ≤2            | <5          | Mild to moderate | Fluvastatin    | Standard    | Yes            |
| 494 | 80≈85 | Male   | No          | No          | No               | 3≈5           | 5≈10        | Mild to moderate | Simvastatin    | Low         | Yes            |
| 495 | 80≈85 | Female | Yes         | Yes         | No               | ≥5            | 5≈10        | No drinking      | Fluvastatin    | Standard    | Yes            |
| 496 | 80≈85 | Male   | Yes         | No          | No               | ≥5            | 5≈10        | Heavy drinking   | Atorvastatin   | Standard    | Yes            |
| 497 | 80≈85 | Male   | No          | No          | No               | ≥5            | ≥10         | No drinking      | Fluvastatin    | Standard    | Yes            |
| 498 | 85≈90 | Male   | No          | No          | Yes              | ≥5            | ≥10         | No drinking      | Rosuvastatin   | Standard    | Yes            |
| 499 | 80≈85 | Male   | No          | No          | No               | 3≈5           | 5≈10        | Mild to moderate | Simvastatin    | Standard    | Yes            |
| 500 | ≥90   | Male   | No          | Yes         | No               | ≥5            | 5≈10        | Mild to moderate | Simvastatin    | Standard    | Yes            |
| 501 | 80≈85 | Male   | No          | No          | No               | 3≈5           | 5≈10        | No drinking      | Atorvastatin   | Low         | Yes            |
| 502 | 80≈85 | Male   | Yes         | Yes         | Yes              | ≥5            | 5≈10        | Heavy drinking   | Fluvastatin    | Standard    | Yes            |
| 503 | 80≈85 | Male   | Yes         | No          | No               | 3≈5           | <5          | Mild to moderate | Simvastatin    | Low         | Yes            |
| 504 | 85≈90 | Female | No          | No          | No               | ≥5            | 5≈10        | No drinking      | Fluvastatin    | Standard    | Yes            |
| 505 | 80≈85 | Female | No          | No          | No               | 3≈5           | ≥10         | Mild to moderate | Pravastatin    | Standard    | Yes            |
| 506 | 80≈85 | Male   | No          | No          | No               | 3≈5           | 5≈10        | Heavy drinking   | Fluvastatin    | Standard    | Yes            |
| 507 | 80≈85 | Female | Yes         | Yes         | No               | ≥5            | 5≈10        | No drinking      | Simvastatin    | Standard    | Yes            |
| 508 | ≥90   | Male   | No          | No          | No               | 3≈5           | <5          | No drinking      | Fluvastatin    | Standard    | Yes            |
| 509 | 85≈90 | Male   | No          | No          | Yes              | ≥5            | 5≈10        | Mild to moderate | Pravastatin    | Standard    | Yes            |
| 510 | 80≈85 | Male   | No          | No          | Yes              | ≥5            | <5          | Mild to moderate | Pravastatin    | Standard    | Yes            |
| 511 | 80≈85 | Male   | No          | No          | No               | ≥5            | 5≈10        | No drinking      | Atorvastatin   | Low         | Yes            |
| 512 | 80≈85 | Male   | Yes         | No          | No               | ≥5            | <5          | Heavy drinking   | Atorvastatin   | Standard    | Yes            |
| 513 | 80≈85 | Male   | No          | No          | No               | 3≈5           | 5≈10        | Mild to moderate | Atorvastatin   | Standard    | Yes            |
| 514 | 80≈85 | Male   | No          | No          | Yes              | 3≈5           | 5≈10        | Mild to moderate | Fluvastatin    | Standard    | Yes            |
| 515 | 80≈85 | Male   | No          | No          | Yes              | ≥5            | 5≈10        | Mild to moderate | Pravastatin    | Standard    | Yes            |
